# Supplementary material
Source: PubMed Central journal article supplement (PMC3614027)
Supplement: NIHMS52328-supplement-01.pdf [file NIHMS52328-supplement-01.pdf]

## Supplemental Figure Legends

### Supplemental Figure 1. Flow cytometric analysis of umbilical cord blood CD25<sup>+</sup> naïve T cells

(A) Naïve CD4<sup>+</sup> CD127<sup>+</sup> T cells were gated as CD45RA<sup>+</sup> CD45RO<sup>-</sup> CD62L<sup>+</sup> and analysed for CD25 expression. (B) CD4<sup>+</sup> naïve T cells were analysed by flow cytometry and divided into four subsets on the basis of CD25 and CD31 expression. Two representative examples (UCB-1 and UCB-2) of 9 cord blood samples (UCB: umbilical cord blood) are shown.

### Supplemental Figure 2. Flow cytometric analysis of CD25 expression from the CD4<sup>+</sup> CD45RO<sup>-</sup> CD62L<sup>+</sup> CD122<sup>+</sup> CD95<sup>+</sup> subset of memory cells with stem cell-like properties

Flow cytometry analysis of peripheral blood CD4 memory cells with stem cell-like properties; (A) Gating strategy of naïve and memory CD4 T cells with stem cell-like properties. Combined analysis of CD31 and CD25 or CD31 and CD122 expression among naïve (B) and memory cells with stem cell-like properties (C), (Representative of 3 donors).

### Supplemental Figure 3. Analysis of IL2RA expression differences on naïve CD25<sup>-</sup> vs naïve CD25<sup>+</sup> T cell subsets purified from 7 donors delineated by 96-sample titan Affymetrix Human Gene 1.1 ST array

(A) Graphical illustration of Affymetrix GeneST Probesets mapping uniquely to *IL2RA* gene (t1dbase.org). (B) Owing, to the limited sample size tested in the microarray analysis (seven independent donors), modest expression differences observed between the CD25<sup>+</sup> and CD25<sup>-</sup> naïve cells did not reach genome-wide significance. To test the hypothesis that the naïve CD4 T cells sorted on the basis of CD25 protein expression have different *IL2RA* mRNA expression levels accounting for the protein expression difference, results from *IL2RA* probesets were evaluated without a correction for multiple testing and a 5-fold difference in expression was observed using 10 probesets in all seven donors. Analysis of *IL2RA* expression for each *IL2RA* Affymetrix GeneST Probesets demonstrated as fold change in gene expression of naïve CD25<sup>+</sup> vs naïve CD25<sup>-</sup> T cells, n=7. (C) Purity check of sorted TCRαβ<sup>+</sup> CD4<sup>+</sup>, CD127<sup>+</sup>, CD45RA<sup>+</sup>, CD62L<sup>+</sup> CD25<sup>+</sup> and TCRαβ<sup>+</sup> CD4<sup>+</sup>, CD127<sup>+</sup>, CD45RA<sup>+</sup>, CD62L<sup>+</sup> CD25<sup>-</sup> naïve T cells.

**Supplemental Table 1.**

Detailed information about antibodies used for immunophenotyping

# S-Fig. 1.

## CD25<sup>+</sup> naive T cells are present in cord blood

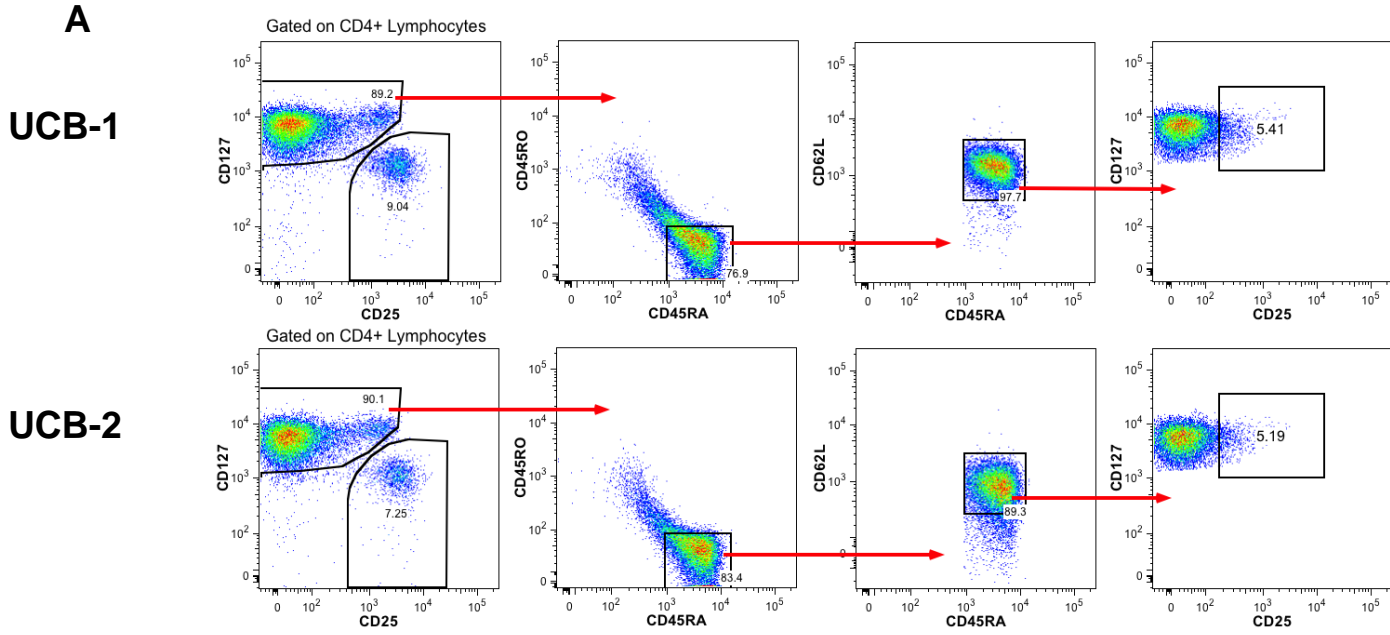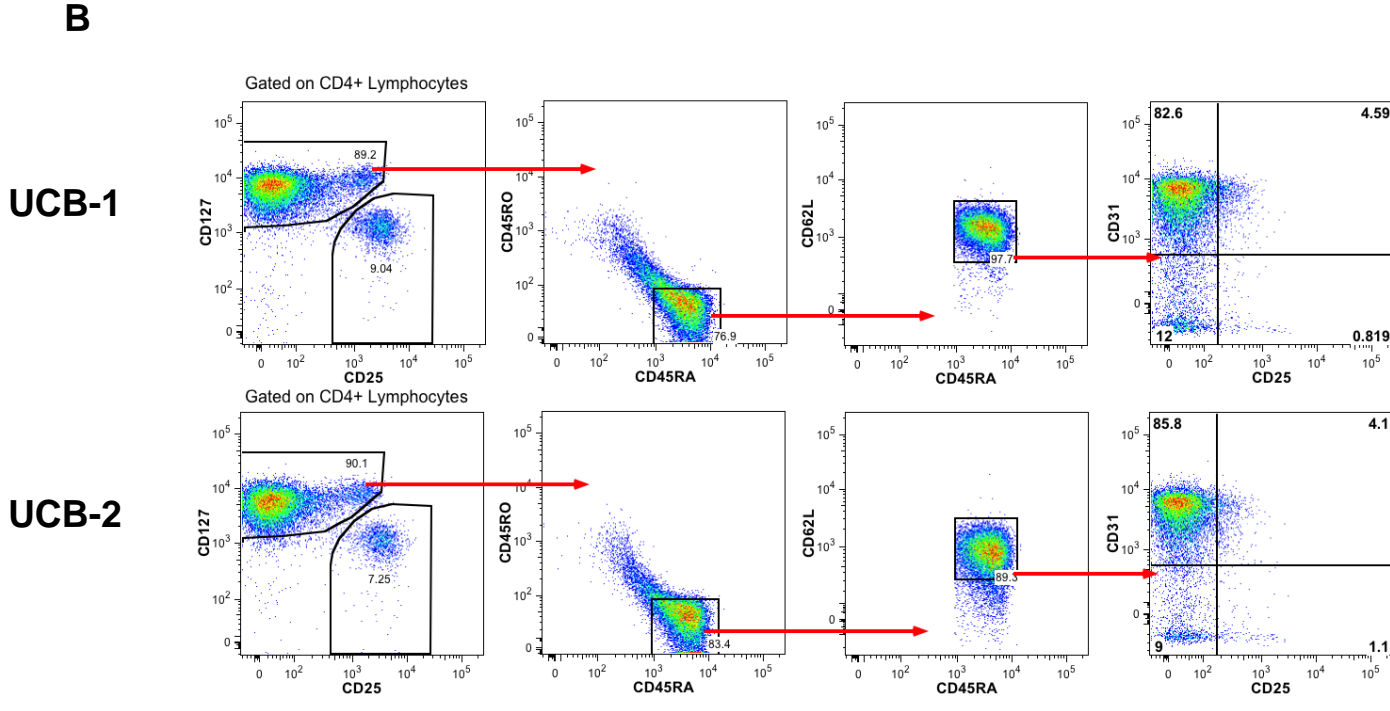

# S-Fig. 2.

## CD4+ stem cell-like memory display heterogeneous CD25 expression

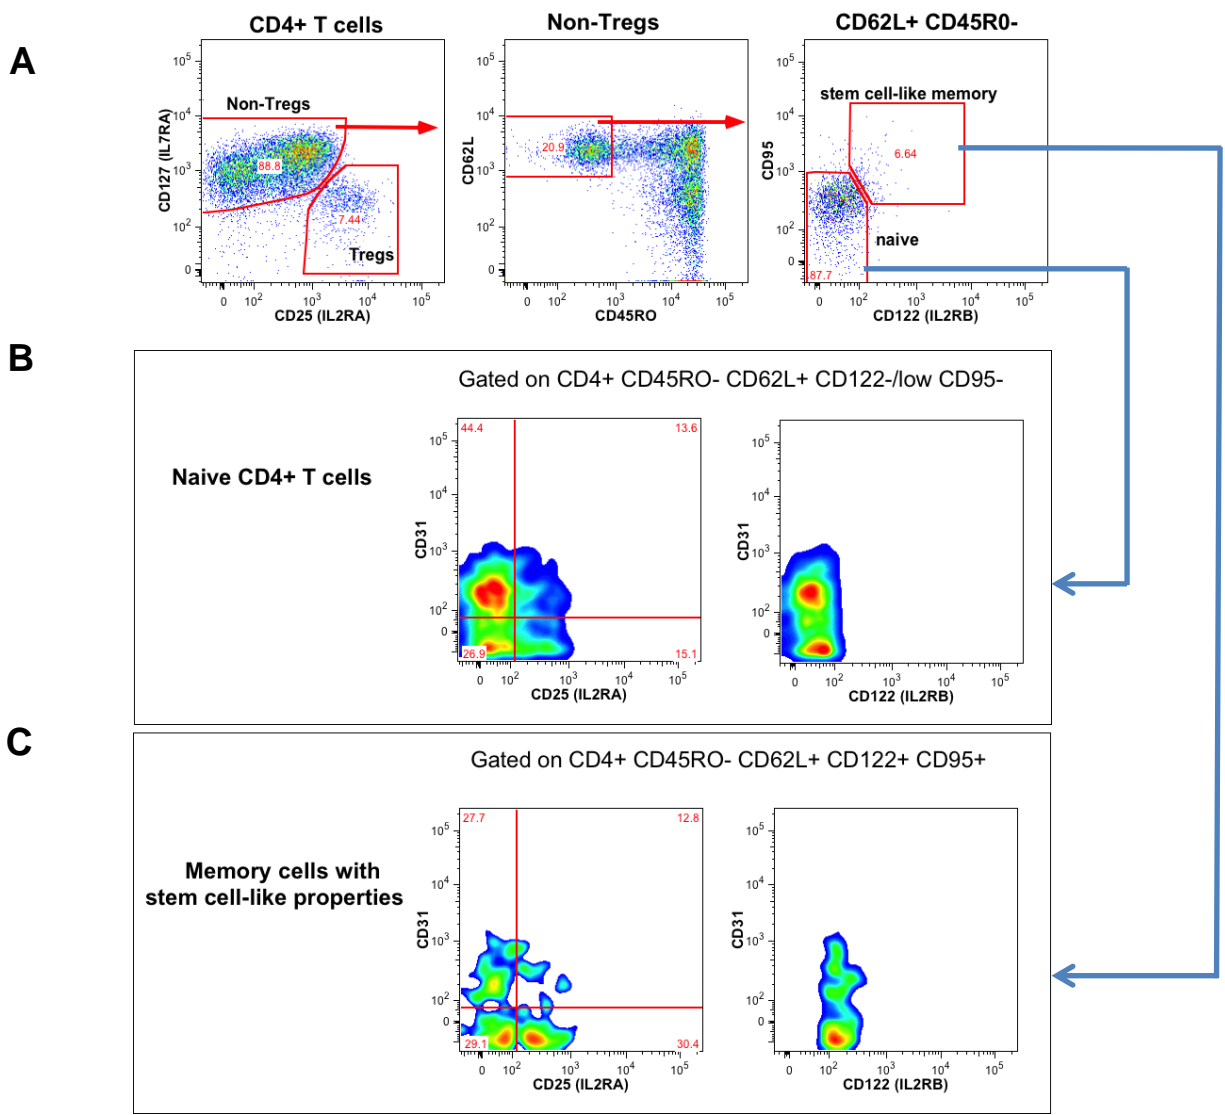

# S-Fig. 3.

A *IL2RA*

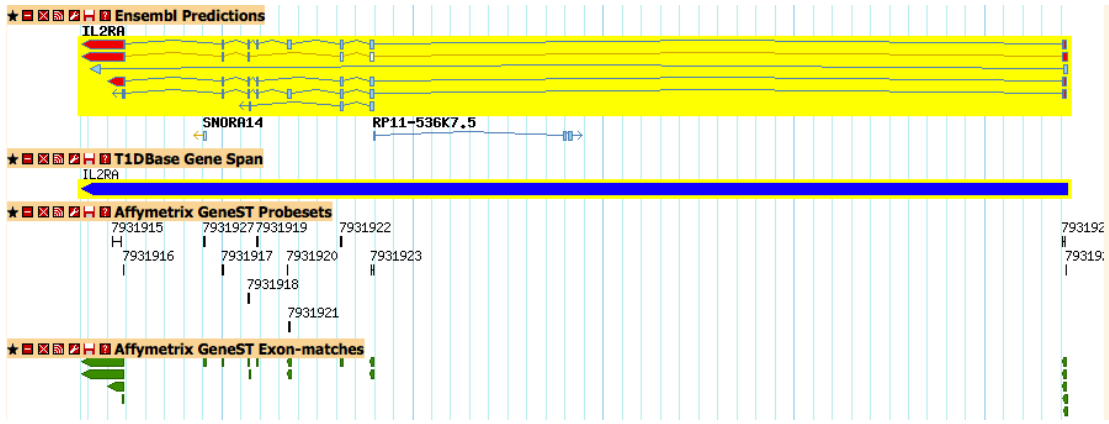

B

| probeset.id | P.Value   | adj.P.Val | Fold change | CI.025 | CI.975 |
|-------------|-----------|-----------|-------------|--------|--------|
| 7931915     | 0.0000032 | 0.1546776 | 4.6         | 1.600  | 2.823  |
| 7931916     | 0.0000280 | 0.3790631 | 5.3         | 1.533  | 3.256  |
| 7931917     | 0.0000062 | 0.1658705 | 5.6         | 1.740  | 3.227  |
| 7931918     | 0.0000059 | 0.1658705 | 5.9         | 1.790  | 3.307  |
| 7931919     | 0.0000177 | 0.2854278 | 3.9         | 1.295  | 2.628  |
| 7931920     | 0.0000055 | 0.1658705 | 2.4         | 0.901  | 1.653  |
| 7931921     | 0.0000162 | 0.2782334 | 5.0         | 1.542  | 3.104  |
| 7931922     | 0.0000026 | 0.1546776 | 4.8         | 1.645  | 2.860  |
| 7931923     | 0.0000033 | 0.1546776 | 5.7         | 1.812  | 3.204  |
| 7931924     | 0.0000005 | 0.1362445 | 4.9         | 1.790  | 2.822  |

C

Flow cytometric analysis of sorted CD25 +/- Naïve CD4 T cell populations (CD4+ CD127+ CD45RA+ CD45RO- CD62L+).

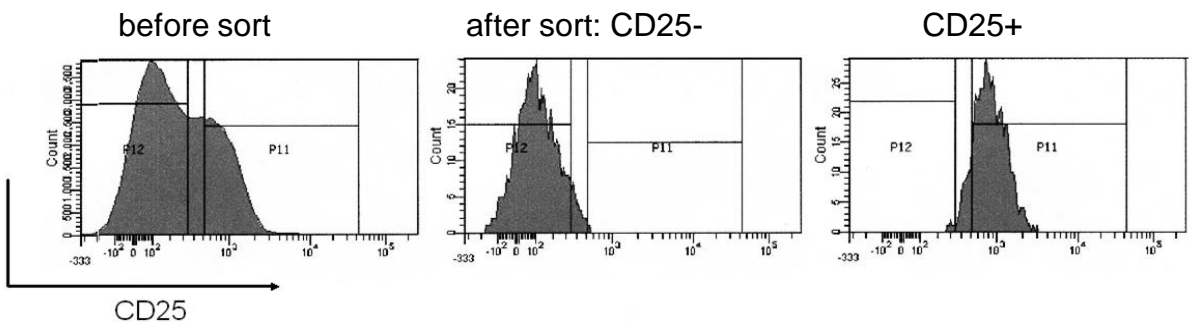

# S-Table. 1.

## Antibodies used for immunophenotyping

| <u>The anti-human monoclonal abs antibodies used for T-cell surface immunophenotyping</u> |                |                |
|-------------------------------------------------------------------------------------------|----------------|----------------|
| Fluorochrome                                                                              | Manufacturer   | Clone name     |
| FITC-conjugated anti-TCR $\alpha\beta$                                                    | BioLegend      | IP26           |
| Alexa Fluor700-conjugated anti-CD4                                                        | BioLegend      | RPA-T4         |
| APC-conjugated anti-CD25                                                                  | BD Biosciences | 2A3            |
| APC-conjugated anti-CD25                                                                  | BD Biosciences | M-A251         |
| PE-CY7-conjugated anti-CD127                                                              | eBioscience    | ebioRDR5       |
| Pacific Blue-conjugated anti-CD45RA                                                       | BioLegend      | HI100          |
| eFluor605-conjugated anti-CD62L                                                           | eBioscience    | DREG56         |
| PE-conjugated anti-CD197                                                                  | BioLegend      | 3D12           |
| PE-conjugated anti-CD27                                                                   | BioLegend      | 323            |
| PE-conjugated anti-CD38                                                                   | eBioscience    | HB7            |
| PE-conjugated anti-CD69                                                                   | BioLegend      | FN50           |
| PE-conjugated anti-CD44                                                                   | BioLegend      | BJ18           |
| PE-conjugated anti-CD137 (41BB)                                                           | BioLegend      | 4B4-1          |
| PE-conjugated anti-CD122                                                                  | BioLegend      | TU27           |
| PE-conjugated anti-CD122                                                                  | BD Biosciences | Mik- $\beta$ 3 |
| PE-conjugated anti-PD-1                                                                   | BioLegend      | EH12.2H7       |
| PE-conjugated anti-CD95                                                                   | BioLegend      | DX-2           |
| PE-conjugated anti-CD57                                                                   | BioLegend      | HCD57          |
| PE-conjugated anti-CD28                                                                   | BioLegend      | CD28.2         |
| PE-conjugated anti-CD31                                                                   | eBioscience    | WM-59          |
| FITC-conjugated anti-CD31                                                                 | eBioscience    | WM-59          |
| FITC-conjugated anti-CD195                                                                | BioLegend      | HEK1/85a       |
| FITC-conjugated anti-CD45RO                                                               | BioLegend      | uch1           |
| FITC-conjugated anti-CD127                                                                | BioLegend      | A019D5         |
| PerCP-Cy5.5-conjugated anti-CD95                                                          | BioLegend      | DX-2           |
| PerCP-Cy5.5-conjugated anti-CD45RO                                                        | BioLegend      | uch1           |
| PerCP-Cy5.5-conjugated anti-CD194                                                         | BioLegend      | TG6/CCR4       |
| APC-conjugated anti-CD95                                                                  | BioLegend      | DX-2           |
| BrilliantViolet421-conjugated anti-CD25                                                   | BioLegend      | BC96           |
| eFluor605-conjugated anti-CD45RA                                                          | eBioscience    | HI100          |

| <u>The anti-human monoclonal abs used for intracellular T-cell immunophenotyping</u> |                |            |
|--------------------------------------------------------------------------------------|----------------|------------|
| Fluorochrome                                                                         | Manufacturer   | Clone name |
| PerCP-Cy5.5-conjugated anti-KI-67                                                    | BD Biosciences | B56        |
| Pacific Blue-conjugated anti-FOXP3                                                   | BioLegend      | 259D       |

| <u>The anti-human monoclonal abs used for intracellular immunophenotyping of pSTAT5 assay</u> |                |                 |
|-----------------------------------------------------------------------------------------------|----------------|-----------------|
| Fluorochrome                                                                                  | Manufacturer   | Clone name      |
| A488-conjugated anti-pSTAT5                                                                   | BD Biosciences | 47/Stat5(pY694) |
| Pacific Blue-conjugated anti-FOXP3                                                            | BioLegend      | 259D            |

| <u>The anti-human monoclonal abs antibodies used for T-cell sorting</u> |                |            |
|-------------------------------------------------------------------------|----------------|------------|
| Fluorochrome                                                            | Manufacturer   | Clone name |
| FITC-conjugated anti-TCR $\alpha\beta$                                  | BioLegend      | IP26       |
| Alexa Fluor700-conjugated anti-CD4                                      | BioLegend      | RPA-T4     |
| APC-conjugated anti-CD25                                                | BD Biosciences | 2A3        |
| APC-conjugated anti-CD25                                                | BD Biosciences | M-A251     |
| PE-CY7-conjugated anti-CD127                                            | eBioscience    | ebioRDR5   |
| Pacific Blue-conjugated anti-CD45RA                                     | BioLegend      | HI100      |
| eFluor605-conjugated anti-CD62L                                         | eBioscience    | DREG56     |
| PE-conjugated anti-CD45RO (microarray sorts)                            | BioLegend      | uch1       |
| PE-conjugated anti-CD31 (functional sorts)                              | eBioscience    | WM-59      |
